# Supplementary material
Source: Springer Nature journal article supplement (https://www.springermedizin.de/resource/supplementary/13011_2011_161_MOESM1_ESM.pdf/9628588)

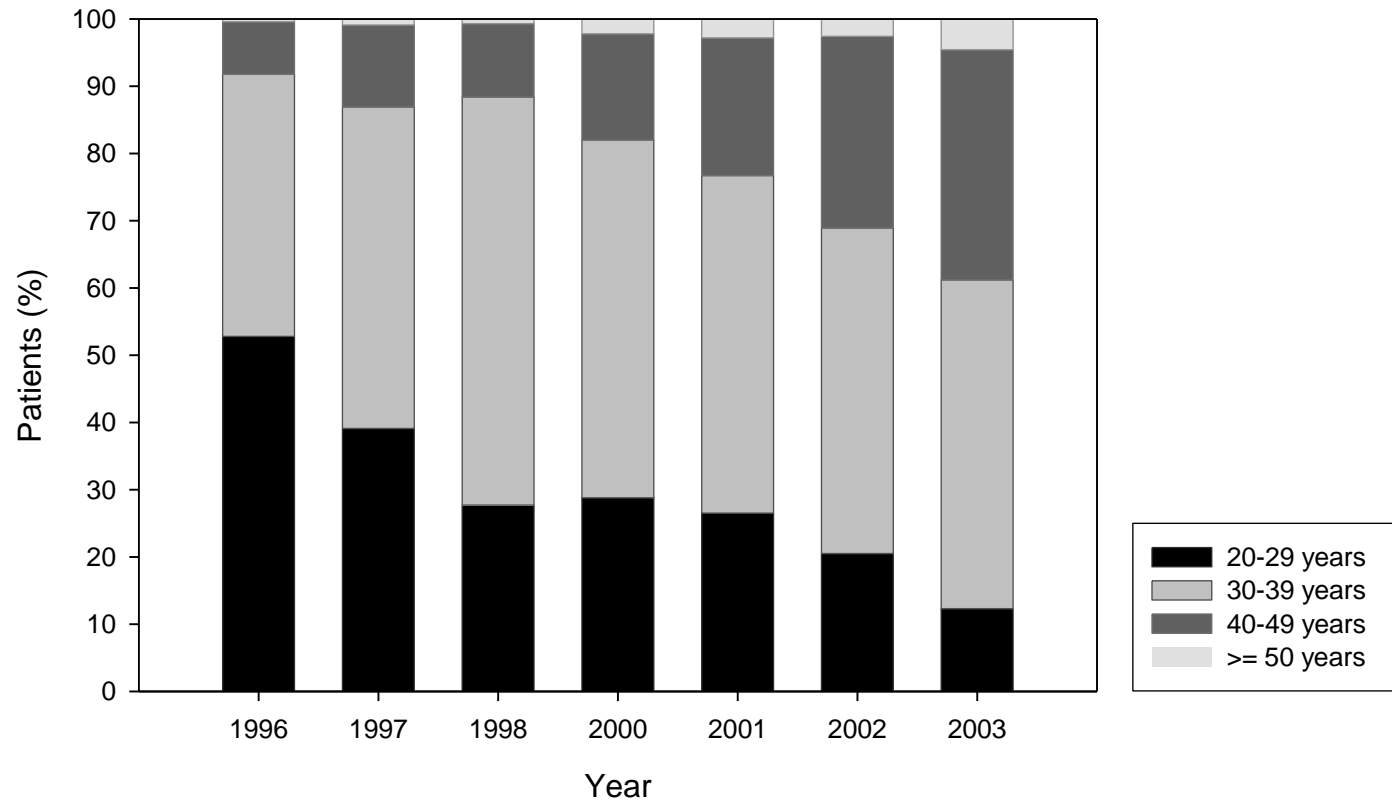

Supplement: MOESM1 [file 9628588]
